# Supplementary material for: The Impact of YRNAs on HNSCC and HPV Infection
Source: MDPI journal article supplement (doi:10.3390/biomedicines11030681), 2023-02-23
Supplement: s1 [file s1]

**Supplementary Table S1.** Different clinical and pathological properties (T stage, N stage, clinical stage, clusters and localization) of whole group of patients' from GEO database in terms of YRNA1, YRNA3, YRNA4 and YRNA5 expressions.

|                |                   | YRNA1               |          | YRNA3               |         | YRNA4               |         | YRNA5               |         |
|----------------|-------------------|---------------------|----------|---------------------|---------|---------------------|---------|---------------------|---------|
|                |                   | Mean $\pm$ SEM      | P value  | Mean $\pm$ SEM      | P value | Mean $\pm$ SEM      | P value | Mean $\pm$ SEM      | P value |
| T stage        | T1, n=35          | 7.699 $\pm$ 0.07563 | 0.6708   | 8.145 $\pm$ 0.04585 | 0.0045  | 7.024 $\pm$ 0.07172 | 0.8238  | 6.727 $\pm$ 0.04421 | 0.0699  |
|                | T2, n=80          | 7.734 $\pm$ 0.05268 |          | 8.179 $\pm$ 0.02991 |         | 6.996 $\pm$ 0.04650 |         | 6.728 $\pm$ 0.02241 |         |
|                | T3, n=58          | 7.818 $\pm$ 0.06685 |          | 8.317 $\pm$ 0.03348 |         | 6.979 $\pm$ 0.04664 |         | 6.651 $\pm$ 0.02206 |         |
|                | T4, n=97          | 7.787 $\pm$ 0.04874 |          | 8.241 $\pm$ 0.02571 |         | 7.025 $\pm$ 0.04176 |         | 6.701 $\pm$ 0.01814 |         |
|                | T1+T2, n=115      | 7.723 $\pm$ 0.04312 | 0.2291   | 8.169 $\pm$ 0.02498 | 0.0019  | 7.005 $\pm$ 0.03887 | 0.531   | 6.728 $\pm$ 0.02048 | 0.1238  |
|                | T3+T4, n=155      | 7.799 $\pm$ 0.03933 |          | 8.270 $\pm$ 0.02054 |         | 7.008 $\pm$ 0.03138 |         | 6.682 $\pm$ 0.01413 |         |
| N stage        | N0, n=94          | 7.681 $\pm$ 0.04882 | 0.0426   | 8.179 $\pm$ 0.02986 | 0.0865  | 7.018 $\pm$ 0.04028 | 0.4306  | 6.697 $\pm$ 0.01875 | 0.4081  |
|                | N1, n=32          | 7.733 $\pm$ 0.08296 |          | 8.289 $\pm$ 0.04754 |         | 6.903 $\pm$ 0.05759 |         | 6.713 $\pm$ 0.04166 |         |
|                | N2, n=132         | 7.841 $\pm$ 0.04059 |          | 8.251 $\pm$ 0.02157 |         | 7.026 $\pm$ 0.03643 |         | 6.706 $\pm$ 0.01694 |         |
|                | N3, n=12          | 7.710 $\pm$ 0.1751  |          | 8.167 $\pm$ 0.05368 |         | 6.975 $\pm$ 0.1369  |         | 6.651 $\pm$ 0.06750 |         |
|                | N0+N1, n=126      | 7.694 $\pm$ 0.04196 | 0.011    | 8.207 $\pm$ 0.02561 | 0.2527  | 6.989 $\pm$ 0.03361 | 0.5776  | 6.701 $\pm$ 0.01746 | 0.9086  |
|                | N2+N3, n=144      | 7.830 $\pm$ 0.03986 |          | 8.244 $\pm$ 0.02032 |         | 7.022 $\pm$ 0.03515 |         | 6.702 $\pm$ 0.01649 |         |
| Clinical Stage | I, n=18           | 7.788 $\pm$ 0.1199  | 0.4849   | 8.115 $\pm$ 0.07607 | 0.0020  | 7.155 $\pm$ 0.1181  | 0.4483  | 6.710 $\pm$ 0.03825 | 0.2652  |
|                | II, n=37          | 7.706 $\pm$ 0.07700 |          | 8.107 $\pm$ 0.04377 |         | 7.052 $\pm$ 0.06945 |         | 6.732 $\pm$ 0.03188 |         |
|                | III, n=37         | 7.683 $\pm$ 0.07506 |          | 8.299 $\pm$ 0.04248 |         | 6.922 $\pm$ 0.05309 |         | 6.687 $\pm$ 0.03883 |         |
|                | IV, n=177         | 7.792 $\pm$ 0.03639 |          | 8.248 $\pm$ 0.01894 |         | 7.000 $\pm$ 0.03003 |         | 6.697 $\pm$ 0.01448 |         |
|                | I+II, n=55        | 7.733 $\pm$ 0.06455 | 0.4885   | 8.110 $\pm$ 0.03816 | 0.0002  | 7.086 $\pm$ 0.06035 | 0.2329  | 6.725 $\pm$ 0.02467 | 0.0982  |
|                | III+IV, n=215     | 7.775 $\pm$ 0.03271 |          | 8.257 $\pm$ 0.01723 |         | 6.986 $\pm$ 0.02640 |         | 6.695 $\pm$ 0.01364 |         |
| Clusters       | Classical, n=30   | 7.435 $\pm$ 0.06887 | < 0.0001 | 8.251 $\pm$ 0.04359 | 0.0006  | 6.806 $\pm$ 0.04903 | 0.0051  | 6.649 $\pm$ 0.03202 | 0.0318  |
|                | Basal, n=84       | 7.647 $\pm$ 0.04906 |          | 8.186 $\pm$ 0.02922 |         | 6.998 $\pm$ 0.04440 |         | 6.671 $\pm$ 0.02041 |         |
|                | Atypical, n=73    | 8.010 $\pm$ 0.05514 |          | 8.328 $\pm$ 0.03250 |         | 7.035 $\pm$ 0.04997 |         | 6.718 $\pm$ 0.02406 |         |
|                | Mesenchymal, n=83 | 7.793 $\pm$ 0.04832 |          | 8.170 $\pm$ 0.02595 |         | 7.063 $\pm$ 0.04340 |         | 6.736 $\pm$ 0.02198 |         |
| Localization   | Oral cavity, n=83 | 7.733 $\pm$ 0.04528 | 0.1123   | 8.238 $\pm$ 0.02653 | 0.2699  | 6.987 $\pm$ 0.03806 | 0.7024  | 6.690 $\pm$ 0.01904 | 0.4513  |
|                | Hypopharynx, n=33 | 7.870 $\pm$ 0.09710 |          | 8.238 $\pm$ 0.05683 |         | 7.062 $\pm$ 0.07307 |         | 6.740 $\pm$ 0.03524 |         |
|                | Larynx, n=48      | 7.650 $\pm$ 0.06966 |          | 8.156 $\pm$ 0.04066 |         | 7.021 $\pm$ 0.06394 |         | 6.676 $\pm$ 0.02734 |         |
|                | Oropharynx, n=102 | 7.811 $\pm$ 0.04951 |          | 8.240 $\pm$ 0.02465 |         | 6.994 $\pm$ 0.04217 |         | 6.708 $\pm$ 0.02156 |         |

**Supplementary Table S2.** Expression analysis of YRNA1, YRNA3, YRNA4 and YRNA5 among GEO database patients in terms of age, smoking status, HPV status, HPV type, viral status and p53 mutation status. Differential criteria, numbers of cases and p values are included in the table.

|                            |        |                        | YRNA1  | YRNA3  | YRNA4  | YRNA5  |
|----------------------------|--------|------------------------|--------|--------|--------|--------|
| <b>Age</b>                 | ALL    | <=60, n = 153          | 0.2747 | 0.3164 | 0.8098 | 0.5427 |
|                            |        | >60, n = 117           |        |        |        |        |
|                            | HPV(+) | <=60, n = 40           | 0.7104 | 0.7187 | 0.3433 | 0.1853 |
|                            |        | >60, n = 33            |        |        |        |        |
|                            | HPV(-) | <=60, n = 112          | 0.2892 | 0.3814 | 0.3863 | 0.7418 |
|                            |        | >60, n = 84            |        |        |        |        |
| <b>Smoking</b>             | ALL    | No/Ex, n = 48          | 0.3218 | 0.2661 | 0.8107 | 0.1707 |
|                            |        | Yes, n = 222           |        |        |        |        |
|                            | HPV(+) | No/Ex, n = 21          | 0.5303 | 0.2533 | 0.2597 | 0.7467 |
|                            |        | Yes, n = 52            |        |        |        |        |
|                            | HPV(-) | No/Ex, n = 27          | 0.5345 | 0.5763 | 0.1729 | 0.1263 |
|                            |        | Yes, n = 169           |        |        |        |        |
| <b>HPV</b>                 | ALL    | Positive, n = 73       | 0.4921 | 0.8671 | 0.9846 | 0.6368 |
|                            |        | Negative, n = 195      |        |        |        |        |
| <b>HPV Type</b>            | ALL    | p16, n = 60            | 0.9483 | 0.7363 | 0.4754 | 0.8008 |
|                            |        | Other, n = 13          |        |        |        |        |
| <b>Viral status</b>        | ALL    | DNA+RNA+, n = 35       | 0.5261 | 0.4007 | 1.000  | 0.1922 |
|                            |        | DNA+RNA-, n = 19       |        |        |        |        |
| <b>p53 Mutation Status</b> | ALL    | WT, n = 142            | 0.440  | 0.6940 | 0.0529 | 0.4679 |
|                            |        | Disruptive, n = 51     |        |        |        |        |
|                            |        | Non-disruptive, n = 33 |        |        |        |        |
|                            | HPV(+) | WT, n = 47             | 0.9245 | 0.7088 | 0.9526 | 0.5547 |
|                            |        | Disruptive, n = 8      |        |        |        |        |
|                            |        | Non-disruptive, n = 4  |        |        |        |        |
|                            | HPV(-) | WT, n = 95             | 0.0177 | 0.5469 | 0.0669 | 0.5946 |
|                            |        | Disruptive, n = 43     |        |        |        |        |
|                            |        | Non-disruptive, n = 29 |        |        |        |        |

**Supplementary Table S3.** Different clinical and pathological properties (T stage, N stage, clinical stage, clusters and localization) of HPV(-) group of patients' from GEO database in terms of YRNA1, YRNA3, YRNA4 and YRNA5 expressions.

|                       |                   | YRNA1               |          | YRNA3               |         | YRNA4               |         | YRNA5               |         |
|-----------------------|-------------------|---------------------|----------|---------------------|---------|---------------------|---------|---------------------|---------|
|                       |                   | Mean $\pm$ SEM      | P value  | Mean $\pm$ SEM      | P value | Mean $\pm$ SEM      | P value | Mean $\pm$ SEM      | P value |
| <b>T stage</b>        | T1, n=25          | 7.736 $\pm$ 0.09818 | 0.6712   | 8.127 $\pm$ 0.05721 | 0.0110  | 7.078 $\pm$ 0.09229 | 0.8592  | 6.700 $\pm$ 0.02901 | 0.0437  |
|                       | T2, n=53          | 7.681 $\pm$ 0.06108 |          | 8.141 $\pm$ 0.03810 |         | 7.009 $\pm$ 0.05429 |         | 6.742 $\pm$ 0.02972 |         |
|                       | T3, n=46          | 7.814 $\pm$ 0.07691 |          | 8.321 $\pm$ 0.04001 |         | 6.965 $\pm$ 0.05127 |         | 6.642 $\pm$ 0.02587 |         |
|                       | T4, n=72          | 7.771 $\pm$ 0.05949 |          | 8.257 $\pm$ 0.03019 |         | 7.008 $\pm$ 0.04495 |         | 6.698 $\pm$ 0.02176 |         |
|                       | T1+T2, n=78       | 7.699 $\pm$ 0.05180 | 0.3077   | 8.136 $\pm$ 0.03152 | 0.0003  | 7.031 $\pm$ 0.04708 | 0.851   | 6.729 $\pm$ 0.02223 | 0.0430  |
|                       | T3+T4, n=118      | 7.788 $\pm$ 0.04692 |          | 8.282 $\pm$ 0.02420 |         | 6.991 $\pm$ 0.03385 |         | 6.676 $\pm$ 0.01680 |         |
| <b>N stage</b>        | N0, n=81          | 7.670 $\pm$ 0.05342 | 0.0996   | 8.177 $\pm$ 0.03257 | 0.1884  | 7.028 $\pm$ 0.04400 | 0.4765  | 6.698 $\pm$ 0.02059 | 0.836   |
|                       | N1, n=24          | 7.729 $\pm$ 0.09705 |          | 8.250 $\pm$ 0.05641 |         | 6.909 $\pm$ 0.07319 |         | 6.695 $\pm$ 0.03343 |         |
|                       | N2, n=83          | 7.835 $\pm$ 0.05179 |          | 8.267 $\pm$ 0.02916 |         | 7.011 $\pm$ 0.04045 |         | 6.699 $\pm$ 0.02119 |         |
|                       | N3, n=8           | 7.805 $\pm$ 0.2594  |          | 8.177 $\pm$ 0.06878 |         | 7.043 $\pm$ 0.2025  |         | 6.684 $\pm$ 0.1011  |         |
|                       | N0+N1, n=105      | 7.683 $\pm$ 0.04664 | 0.0193   | 8.193 $\pm$ 0.02827 | 0.0975  | 7.001 $\pm$ 0.03799 | 0.603   | 6.697 $\pm$ 0.01755 | 0.7851  |
|                       | N2+N3, n=91       | 7.832 $\pm$ 0.05187 |          | 8.259 $\pm$ 0.02731 |         | 7.014 $\pm$ 0.04051 |         | 6.698 $\pm$ 0.02105 |         |
| <b>Clinical Stage</b> | I, n=16           | 7.853 $\pm$ 0.1253  | 0.4807   | 8.149 $\pm$ 0.08117 | 0.0204  | 7.218 $\pm$ 0.1239  | 0.2016  | 6.741 $\pm$ 0.03528 | 0.1995  |
|                       | II, n=31          | 7.680 $\pm$ 0.08512 |          | 8.100 $\pm$ 0.05054 |         | 7.067 $\pm$ 0.07573 |         | 6.731 $\pm$ 0.03651 |         |
|                       | III, n=28         | 7.677 $\pm$ 0.08709 |          | 8.273 $\pm$ 0.05049 |         | 6.936 $\pm$ 0.06708 |         | 6.668 $\pm$ 0.03376 |         |
|                       | IV, n=121         | 7.775 $\pm$ 0.04552 |          | 8.254 $\pm$ 0.02408 |         | 6.980 $\pm$ 0.03293 |         | 6.690 $\pm$ 0.01760 |         |
|                       | I+II, n=47        | 7.739 $\pm$ 0.07075 | 0.7929   | 8.117 $\pm$ 0.04292 | 0.0022  | 7.118 $\pm$ 0.06543 | 0.0795  | 6.735 $\pm$ 0.02668 | 0.047   |
|                       | III+IV, n=149     | 7.757 $\pm$ 0.04043 |          | 8.258 $\pm$ 0.02167 |         | 6.972 $\pm$ 0.02950 |         | 6.686 $\pm$ 0.01560 |         |
| <b>Clusters</b>       | Classical, n=27   | 7.429 $\pm$ 0.07567 | < 0.0001 | 8.250 $\pm$ 0.04677 | 0.2605  | 6.811 $\pm$ 0.05398 | 0.0224  | 6.646 $\pm$ 0.03522 | 0.01    |
|                       | Basal, n=70       | 7.651 $\pm$ 0.05649 |          | 8.193 $\pm$ 0.03121 |         | 6.992 $\pm$ 0.05005 |         | 6.679 $\pm$ 0.02274 |         |
|                       | Atypical, n=38    | 7.958 $\pm$ 0.07841 |          | 8.276 $\pm$ 0.04809 |         | 7.060 $\pm$ 0.06876 |         | 6.744 $\pm$ 0.03671 |         |
|                       | Mesenchymal, n=61 | 7.785 $\pm$ 0.05349 |          | 8.182 $\pm$ 0.03151 |         | 7.051 $\pm$ 0.05142 |         | 6.759 $\pm$ 0.02696 |         |
| <b>Localization</b>   | Oral cavity, n=70 | 7.752 $\pm$ 0.04995 | 0.1737   | 8.251 $\pm$ 0.02879 | 0.4842  | 6.999 $\pm$ 0.04160 | 0.5243  | 6.695 $\pm$ 0.02105 | 0.2719  |
|                       | Hypopharynx, n=30 | 7.886 $\pm$ 0.1056  |          | 8.218 $\pm$ 0.05998 |         | 7.084 $\pm$ 0.07844 |         | 6.753 $\pm$ 0.03779 |         |
|                       | Larynx, n=45      | 7.636 $\pm$ 0.07088 |          | 8.169 $\pm$ 0.04194 |         | 7.006 $\pm$ 0.06261 |         | 6.672 $\pm$ 0.02719 |         |
|                       | Oropharynx, n=47  | 7.769 $\pm$ 0.07975 |          | 8.227 $\pm$ 0.04185 |         | 6.963 $\pm$ 0.05832 |         | 6.683 $\pm$ 0.03009 |         |

**Supplementary Table S4.** Different clinical and pathological properties (T stage, N stage, clinical stage, clusters and localization) of HPV(+) group of patients' from GEO database in terms of YRNA1, YRNA3, YRNA4 and YRNA5 expressions.

|                       |                   | YRNA1               |         | YRNA3               |         | YRNA4               |         | YRNA5               |         |
|-----------------------|-------------------|---------------------|---------|---------------------|---------|---------------------|---------|---------------------|---------|
|                       |                   | Mean $\pm$ SEM      | P value |
| <b>T stage</b>        | T1, n=10          | 7.606 $\pm$ 0.1002  | 0.597   | 8.190 $\pm$ 0.07527 | 0.5312  | 6.890 $\pm$ 0.09192 | 0.5335  | 6.794 $\pm$ 0.1398  | 0.8168  |
|                       | T2, n=27          | 7.836 $\pm$ 0.09863 |         | 8.254 $\pm$ 0.04503 |         | 6.971 $\pm$ 0.08862 |         | 6.699 $\pm$ 0.03172 |         |
|                       | T3, n=12          | 7.835 $\pm$ 0.1383  |         | 8.301 $\pm$ 0.05426 |         | 7.033 $\pm$ 0.1137  |         | 6.683 $\pm$ 0.03974 |         |
|                       | T4, n=24          | 7.822 $\pm$ 0.08387 |         | 8.195 $\pm$ 0.05084 |         | 7.081 $\pm$ 0.1024  |         | 6.704 $\pm$ 0.03381 |         |
|                       | T1+T2, n=37       | 7.774 $\pm$ 0.07806 | 0.5115  | 8.237 $\pm$ 0.03839 | 0.9019  | 6.949 $\pm$ 0.06889 | 0.1499  | 6.725 $\pm$ 0.04359 | 0.675   |
|                       | T3+T4, n=36       | 7.826 $\pm$ 0.07131 |         | 8.230 $\pm$ 0.03889 |         | 7.065 $\pm$ 0.07721 |         | 6.697 $\pm$ 0.02587 |         |
| <b>N stage</b>        | N0, n=13          | 7.751 $\pm$ 0.1204  | 0.5334  | 8.191 $\pm$ 0.07673 | 0.1265  | 6.954 $\pm$ 0.1005  | 0.9403  | 6.690 $\pm$ 0.04574 | 0.3018  |
|                       | N1, n=8           | 7.746 $\pm$ 0.1704  |         | 8.409 $\pm$ 0.07701 |         | 6.883 $\pm$ 0.07665 |         | 6.768 $\pm$ 0.1384  |         |
|                       | N2, n=48          | 7.845 $\pm$ 0.06710 |         | 8.223 $\pm$ 0.03123 |         | 7.055 $\pm$ 0.07208 |         | 6.718 $\pm$ 0.02894 |         |
|                       | N3, n=4           | 7.520 $\pm$ 0.07293 |         | 8.147 $\pm$ 0.09712 |         | 6.840 $\pm$ 0.07620 |         | 6.584 $\pm$ 0.01296 |         |
|                       | N0+N1, n=21       | 7.749 $\pm$ 0.09623 | 0.5464  | 8.274 $\pm$ 0.05949 | 0.3455  | 6.927 $\pm$ 0.06778 | 0.6303  | 6.720 $\pm$ 0.05834 | 0.8693  |
|                       | N2+N3, n=52       | 7.820 $\pm$ 0.06325 |         | 8.217 $\pm$ 0.02967 |         | 7.038 $\pm$ 0.06716 |         | 6.707 $\pm$ 0.02716 |         |
| <b>Clinical Stage</b> | I, n=2            | 7.267 $\pm$ 0.08565 | 0.2166  | 7.846 $\pm$ 0.1133  | 0.0449  | 6.657 $\pm$ 0.1089  | 0.4457  | 6.454 $\pm$ 0.03065 | 0.0646  |
|                       | II, n=6           | 7.841 $\pm$ 0.1852  |         | 8.144 $\pm$ 0.07465 |         | 6.972 $\pm$ 0.1866  |         | 6.739 $\pm$ 0.06174 |         |
|                       | III, n=37         | 7.702 $\pm$ 0.1566  |         | 8.378 $\pm$ 0.07478 |         | 6.879 $\pm$ 0.06772 |         | 6.747 $\pm$ 0.1238  |         |
|                       | IV, n=177         | 7.830 $\pm$ 0.05989 |         | 8.234 $\pm$ 0.02981 |         | 7.043 $\pm$ 0.06295 |         | 6.711 $\pm$ 0.02561 |         |
|                       | I+II, n=8         | 7.697 $\pm$ 0.1658  | 0.4217  | 8.070 $\pm$ 0.07635 | 0.0330  | 6.894 $\pm$ 0.1474  | 0.3016  | 6.668 $\pm$ 0.06522 | 0.7573  |
|                       | III+IV, n=65      | 7.812 $\pm$ 0.05578 |         | 8.254 $\pm$ 0.02817 |         | 7.020 $\pm$ 0.05535 |         | 6.716 $\pm$ 0.02745 |         |
| <b>Clusters</b>       | Classical, n=3    | 7.490 $\pm$ 0.1271  | 0.0075  | 8.261 $\pm$ 0.1399  | 0.0020  | 6.762 $\pm$ 0.08059 | 0.2714  | 6.678 $\pm$ 0.05534 | 0.9492  |
|                       | Basal, n=13       | 7.639 $\pm$ 0.09184 |         | 8.158 $\pm$ 0.08818 |         | 7.008 $\pm$ 0.1007  |         | 6.652 $\pm$ 0.04636 |         |
|                       | Atypical, n=35    | 8.068 $\pm$ 0.07733 |         | 8.385 $\pm$ 0.04186 |         | 7.008 $\pm$ 0.07351 |         | 6.689 $\pm$ 0.03030 |         |
|                       | Mesenchymal, n=22 | 7.815 $\pm$ 0.1081  |         | 8.135 $\pm$ 0.04441 |         | 7.095 $\pm$ 0.08209 |         | 6.674 $\pm$ 0.03323 |         |
| <b>Localization</b>   | Oral cavity, n=13 | 7.630 $\pm$ 0.1057  | 0.4221  | 8.169 $\pm$ 0.06772 | 0.0434  | 6.919 $\pm$ 0.09584 | 0.9115  | 6.661 $\pm$ 0.04485 | 0.6299  |
|                       | Hypopharynx, n=3  | 7.715 $\pm$ 0.1749  |         | 8.444 $\pm$ 0.1532  |         | 6.838 $\pm$ 0.1412  |         | 6.607 $\pm$ 0.04403 |         |
|                       | Larynx, n=3       | 7.858 $\pm$ 0.3790  |         | 7.962 $\pm$ 0.1460  |         | 7.241 $\pm$ 0.4668  |         | 6.725 $\pm$ 0.1893  |         |
|                       | Oropharynx, n=54  | 7.842 $\pm$ 0.06279 |         | 8.252 $\pm$ 0.02931 |         | 7.024 $\pm$ 0.06158 |         | 6.728 $\pm$ 0.03110 |         |

**Supplementary Table S5.** GSEA results of YRNA3, YRNA4 and YRNA5 in HPV(+) and HPV(-) groups. The table shows enriched pathways in which YRNAs were found and normalized enrichment score (NES), nominal *p* value (NOM *p*-val) and false discovery rate *q* value (FDR *q*-val); *p* value < 0.05 and FDR *q* value < 0.25 considered as significant.

| YRNA3 HPV-                                                                             |            |                   |                   |
|----------------------------------------------------------------------------------------|------------|-------------------|-------------------|
| NAME                                                                                   | NES        | NOM <i>p</i> -val | FDR <i>q</i> -val |
| GOBP NEGATIVE REGULATION OF TELOMERE MAINTENANCE VIA TELOMERE LENGTHENING              | -1.9782459 | 0.0               | 0.053096812       |
| HP RECURRENT SINOPULMONARY INFECTIONS                                                  | -1.8658305 | 0.0               | 0.12829725        |
| GOMF MODIFICATION DEPENDENT PROTEIN BINDING                                            | -1.8820041 | 0.0               | 0.12906608        |
| HP OVERWEIGHT                                                                          | -1.8980998 | 0.0               | 0.14073196        |
| GOBP REGULATION OF DNA TEMPLATED TRANSCRIPTION ELONGATION                              | -1.8234807 | 0.0               | 0.15425658        |
| GOBP NEGATIVE REGULATION OF TELOMERE MAINTENANCE                                       | -1.8324279 | 0.0019047619      | 0.1582201         |
| HP CHRONIC RHINITIS                                                                    | -1.7905881 | 0.0020325202      | 0.1612035         |
| GOBP EXTRACELLULAR TRANSPORT                                                           | -1.8120512 | 0.0               | 0.16179463        |
| HP RHINITIS                                                                            | -1.8412032 | 0.001992032       | 0.16405647        |
| GOMF METHYLATED HISTONE BINDING                                                        | -1.7934369 | 0.0               | 0.17126898        |
| GOMF TAU PROTEIN KINASE ACTIVITY                                                       | -1.7998508 | 0.0               | 0.17340714        |
| GOBP REGULATION OF MRNA PROCESSING                                                     | -1.7601594 | 0.012145749       | 0.17780732        |
| HP TYPE I DIABETES MELLITUS                                                            | -1.7604265 | 0.0               | 0.18889232        |
| GOBP REGULATION OF TRANSCRIPTION ELONGATION FROM RNA POLYMERASE II PROMOTER            | -1.76461   | 0.002008032       | 0.18889286        |
| HP SACCADIC SMOOTH PURSUIT                                                             | -1.7723002 | 0.004016064       | 0.196775          |
| GOMF LYSINE ACETYLATED HISTONE BINDING                                                 | -1.766147  | 0.004115226       | 0.19932006        |
| GOCC PML BODY                                                                          | -1.7444333 | 0.0               | 0.20205322        |
| GOBP MITOTIC G2 M TRANSITION CHECKPOINT                                                | -1.7472899 | 0.0               | 0.20507146        |
| GOBP REGULATION OF MRNA 3 END PROCESSING                                               | -1.7233238 | 0.01183432        | 0.2371359         |
| HP RECURRENT MYCOBACTERIAL INFECTIONS                                                  | -1.7241713 | 0.00967118        | 0.24631071        |
| YRNA3 HPV+                                                                             |            |                   |                   |
| GOMF ELECTRON TRANSFER ACTIVITY                                                        | 1.8677815  | 0.0               | 0.19593209        |
| GOMF OXIDOREDUCTASE ACTIVITY ACTING ON NAD P H QUINONE OR SIMILAR COMPOUND AS ACCEPTOR | 1.764012   | 0.0019267823      | 0.19837508        |
| GOCC MITOCHONDRIAL PROTEIN CONTAINING COMPLEX                                          | 1.7686732  | 0.002008032       | 0.20060508        |
| GOBP ATP SYNTHESIS COUPLED ELECTRON TRANSPORT                                          | 1.7705008  | 0.004032258       | 0.2146511         |
| GOMF OXIDOREDUCTASE ACTIVITY ACTING ON NAD P H                                         | 1.7719706  | 0.0019607844      | 0.23302357        |

|                                                                      |            |              |             |
|----------------------------------------------------------------------|------------|--------------|-------------|
| GOBP RESPIRATORY ELECTRON TRANSPORT CHAIN                            | 1.7767512  | 0.002004008  | 0.23910148  |
| GOCC INNER MITOCHONDRIAL MEMBRANE PROTEIN COMPLEX                    | 1.7828401  | 0.0020283975 | 0.24707568  |
| HALLMARK OXIDATIVE PHOSPHORYLATION                                   | 1.7626885  | 0.002004008  | 0.005301828 |
| HALLMARK REACTIVE OXYGEN SPECIES PATHWAY                             | 1.4093591  | 0.03968254   | 0.24114163  |
| EIF4E UP                                                             | 1.649572   | 0.0076045627 | 0.08992033  |
| JAK2 DN.V1 DN                                                        | -1.701562  | 0.0          | 0.021776728 |
| <b>YRNA4 HPV+</b>                                                    |            |              |             |
| HP MUSCLE ABNORMALITY RELATED TO MITOCHONDRIAL DYSFUNCTION           | -1.7900214 | 0.003816794  | 0.08160625  |
| GOCC MITOCHONDRIAL PROTEIN CONTAINING COMPLEX                        | -1.7933891 | 0.001984127  | 0.084746495 |
| GOCC RIBOSOME                                                        | -1.7576778 | 0.0020120724 | 0.086412735 |
| GOCC INNER MITOCHONDRIAL MEMBRANE PROTEIN COMPLEX                    | -1.7612879 | 0.0019880715 | 0.086973555 |
| GOCC SM LIKE PROTEIN FAMILY COMPLEX                                  | -1.7641017 | 0.005905512  | 0.08813139  |
| HP ABNORMAL ACTIVITY OF MITOCHONDRIAL RESPIRATORY CHAIN              | -1.7795303 | 0.001984127  | 0.08942255  |
| HP DECREASED ACTIVITY OF MITOCHONDRIAL COMPLEX IV                    | -1.7957678 | 0.0          | 0.090028845 |
| GOBP PSEUDOURIDINE SYNTHESIS                                         | -1.7517582 | 0.002016129  | 0.09041234  |
| HP DECREASED ACTIVITY OF MITOCHONDRIAL COMPLEX I                     | -1.7663393 | 0.003868472  | 0.09097942  |
| GOCC ORGANELLAR RIBOSOME                                             | -1.7440696 | 0.003984064  | 0.092969164 |
| HP FOCAL T2 HYPERINTENSE BASAL GANGLIA LESION                        | -1.7405037 | 0.0019646366 | 0.094048716 |
| GOMF RNA POLYMERASE ACTIVITY                                         | -1.7681264 | 0.0020120724 | 0.094050676 |
| GOCC MITOCHONDRIAL LARGE RIBOSOMAL SUBUNIT                           | -1.7460752 | 0.004008016  | 0.09429248  |
| GOCC SPLICEOSOMAL TRI SNRNP COMPLEX                                  | -1.7720566 | 0.0          | 0.0952907   |
| GOBP RESPIRATORY ELECTRON TRANSPORT CHAIN                            | -1.7224374 | 0.006        | 0.09538635  |
| HP ABNORMAL MITOCHONDRIA IN MUSCLE TISSUE                            | -1.7243658 | 0.0019493178 | 0.09586323  |
| HP CYTOCHROME C OXIDASE NEGATIVE MUSCLE FIBERS                       | -1.7192985 | 0.009746589  | 0.09651434  |
| GOCC RESPIRASOME                                                     | -1.7246213 | 0.001980198  | 0.09916524  |
| GOMF STRUCTURAL CONSTITUENT OF RIBOSOME                              | -1.7967312 | 0.0020449897 | 0.099606596 |
| GOCC RNA POLYMERASE III COMPLEX                                      | -1.7262846 | 0.004016064  | 0.10052045  |
| HP INCREASED CSF LACTATE                                             | -1.8023745 | 0.0          | 0.10266626  |
| HP PROXIMAL TUBULOPATHY                                              | -1.7271383 | 0.001984127  | 0.10312337  |
| GOMF OXIDOREDUCTION DRIVEN ACTIVE TRANSMEMBRANE TRANSPORTER ACTIVITY | -1.710967  | 0.004        | 0.10659187  |
| GOBP ATP SYNTHESIS COUPLED ELECTRON TRANSPORT                        | -1.7274623 | 0.003968254  | 0.10700925  |
| GOBP RRNA MODIFICATION                                               | -1.7291517 | 0.015968064  | 0.10883787  |

|                                                                                            |            |              |             |
|--------------------------------------------------------------------------------------------|------------|--------------|-------------|
| GOBP MATURATION OF LSU RRNA                                                                | -1.703576  | 0.008316008  | 0.11107196  |
| HP ABNORMAL BRAINSTEM MRI SIGNAL INTENSITY                                                 | -1.7047994 | 0.007920792  | 0.11288348  |
| GOCC SMALL RIBOSOMAL SUBUNIT                                                               | -1.6922555 | 0.004048583  | 0.11615897  |
| HP FOCAL T2 HYPERINTENSE BRAINSTEM LESION                                                  | -1.6871963 | 0.013257576  | 0.118535146 |
| GOCC LARGE RIBOSOMAL SUBUNIT                                                               | -1.8028729 | 0.0          | 0.11889576  |
| GOBP RIBONUCLEOPROTEIN COMPLEX SUBUNIT ORGANIZATION                                        | -1.6963247 | 0.00203666   | 0.11906513  |
| GOMF NADH DEHYDROGENASE ACTIVITY                                                           | -1.6884307 | 0.009689922  | 0.11932154  |
| GOCC NADH DEHYDROGENASE COMPLEX                                                            | -1.6922985 | 0.007858546  | 0.119328335 |
| HP ABNORMAL CSF METABOLITE LEVEL                                                           | -1.6932342 | 0.0019455253 | 0.120735504 |
| GOBP RIBOSOMAL LARGE SUBUNIT ASSEMBLY                                                      | -1.6787145 | 0.014256619  | 0.123646736 |
| GOBP MITOCHONDRIAL ELECTRON TRANSPORT NADH TO UBIQUINONE                                   | -1.6763805 | 0.007984032  | 0.12521635  |
| HP MITOCHONDRIAL MYOPATHY                                                                  | -1.6743815 | 0.007797271  | 0.1259581   |
| GOBP OXIDATIVE PHOSPHORYLATION                                                             | -1.6791629 | 0.001980198  | 0.12612931  |
| HP DECREASED ACTIVITY OF THE PYRUVATE DEHYDROGENASE COMPLEX                                | -1.680187  | 0.01369863   | 0.12710579  |
| GOCC SPLICEOSOMAL SNRNP COMPLEX                                                            | -1.8080812 | 0.001992032  | 0.12964629  |
| GOBP RNA 5 END PROCESSING                                                                  | -1.6680386 | 0.018518519  | 0.1349184   |
| HP ABNORMAL BASAL GANGLIA MRI SIGNAL INTENSITY                                             | -1.8183807 | 0.0          | 0.13517973  |
| GOBP RIBOSOMAL LARGE SUBUNIT BIOGENESIS                                                    | -1.8318129 | 0.0          | 0.14006335  |
| GOBP RIBOSOME ASSEMBLY                                                                     | -1.6560718 | 0.014830508  | 0.15311626  |
| HP PROGRESSIVE SPASTIC PARAPLEGIA                                                          | -1.6572673 | 0.007858546  | 0.1538089   |
| GOBP NADH DEHYDROGENASE COMPLEX ASSEMBLY                                                   | -1.6537895 | 0.01734104   | 0.15487425  |
| GOCC SNO S RNA CONTAINING RIBONUCLEOPROTEIN COMPLEX                                        | -1.642935  | 0.020325202  | 0.16865261  |
| GOBP MITOCHONDRIAL RESPIRATORY CHAIN COMPLEX ASSEMBLY                                      | -1.6440282 | 0.019267824  | 0.16942422  |
| GOCC ORGANELLE INNER MEMBRANE                                                              | -1.6445376 | 0.004        | 0.17163943  |
| GOBP SPLICEOSOMAL SNRNP ASSEMBLY                                                           | -1.8730546 | 0.0020325202 | 0.20264482  |
| HP HEMANGIOBLASTOMA                                                                        | -1.6278477 | 0.005882353  | 0.20333087  |
| GOCC RIBOSOMAL SUBUNIT                                                                     | -1.8321669 | 0.0          | 0.20796385  |
| GOCC CYTOCHROME COMPLEX                                                                    | -1.6158822 | 0.0121951215 | 0.23196703  |
| GOBP RIBONUCLEOPROTEIN COMPLEX BIOGENESIS                                                  | -1.6103685 | 0.022403259  | 0.23990421  |
| GOCC RESPIRATORY CHAIN COMPLEX IV                                                          | -1.6084716 | 0.009861933  | 0.2415121   |
| GOBP MATURATION OF 5 8S RRNA FROM TRICISTRONIC RRNA TRANSCRIPT SSU RRNA 5 8S RRNA LSU RRNA | -1.6110382 | 0.022357723  | 0.24231188  |
| GOBP MATURATION OF 5 8S RRNA                                                               | -1.6047502 | 0.012658228  | 0.2439163   |
| HP ABNORMALITY OF THE INTERVERTEBRAL DISK                                                  | -1.606121  | 0.0077669905 | 0.24414927  |
| HALLMARK DNA REPAIR                                                                        | -1.6215535 | 0.004166667  | 0.05216014  |
| YRNA5 HPV+                                                                                 |            |              |             |

|                                     |           |             |            |
|-------------------------------------|-----------|-------------|------------|
| HALLMARK TGF BETA SIGNALING         | 1.6527486 | 0.003960396 | 0.07703276 |
| HALLMARK HEDGEHOG SIGNALING         | 1.5475082 | 0.025948104 | 0.1820822  |
| HALLMARK APICAL JUNCTION            | 1.3922218 | 0.054435484 | 0.22485684 |
| HALLMARK UV RESPONSE DN             | 1.4895577 | 0.031746034 | 0.24095283 |
| HALLMARK WNT BETA CATENIN SIGNALING | 1.3985876 | 0.083333336 | 0.24317823 |

**Supplementary Table S6.** List of genes derived from NGS analysis of modified FaDu and Detroit562 cell lines with YRNA1 overexpressing plasmid found in infectious disease pathways.

| Genes from FaDu | Genes from FaDu | Genes from Detroit562 | Genes from Detroit562 |
|-----------------|-----------------|-----------------------|-----------------------|
| <i>ACTB</i>     | <i>RPL35</i>    | <i>HLA-B</i>          | <i>GNAS</i>           |
| <i>HMGA1</i>    | <i>RPL41</i>    | <i>HLA-C</i>          | <i>RPS29</i>          |
| <i>NPM1</i>     | <i>RPL7A</i>    | <i>CAV1</i>           | <i>YWHAE</i>          |
| <i>RPL10</i>    | <i>RPLP1</i>    | <i>RPS3A</i>          | <i>RPS15A</i>         |
| <i>RPL24</i>    | <i>RPS16</i>    | <i>RPS2</i>           | <i>RPS27A</i>         |
| <i>RPL30</i>    | <i>RPS20</i>    | <i>HLA-A</i>          | <i>RPL29</i>          |
| <i>RPL39</i>    | <i>RPS6</i>     | <i>RPS6</i>           | <i>PPIA</i>           |
| <i>RPL6</i>     | <i>TUBA1B</i>   | <i>UBC</i>            | <i>RPL35</i>          |
| <i>RPLP0</i>    | <i>ENO1</i>     | <i>RPS14</i>          | <i>ENO1</i>           |
| <i>RPS14</i>    | <i>HSP90AB1</i> | <i>RPS16</i>          | <i>RPL32</i>          |
| <i>RPS2</i>     | <i>RAN</i>      | <i>B2M</i>            | <i>RPL10</i>          |
| <i>RPS3A</i>    | <i>RPL18A</i>   | <i>RPS10</i>          | <i>CALR</i>           |
| <i>SLC25A5</i>  | <i>RPL3</i>     | <i>RPS13</i>          | <i>TUBA1B</i>         |
| <i>XRCC6</i>    | <i>RPL38</i>    | <i>RPL26</i>          | <i>RPLP1</i>          |
| <i>ACTG1</i>    | <i>RPL5</i>     | <i>RPL41</i>          | <i>RPLP0</i>          |
| <i>HSP90AA1</i> | <i>RPL8</i>     | <i>RPS9</i>           | <i>RPL4</i>           |
| <i>PPIA</i>     | <i>RPS11</i>    | <i>NPM1</i>           | <i>HLA-H</i>          |
| <i>RPL12</i>    | <i>RPS18</i>    | <i>HSP90AB1</i>       | <i>RPL8</i>           |
| <i>RPL29</i>    | <i>RPS25</i>    | <i>ACTB</i>           | <i>HSP90AA1</i>       |
| <i>RPS8</i>     | <i>UBC</i>      |                       |                       |



**A**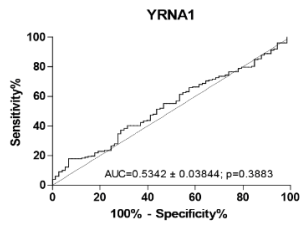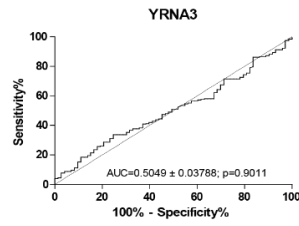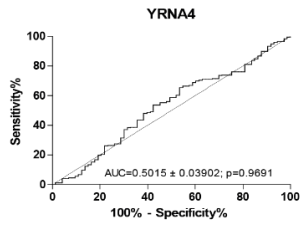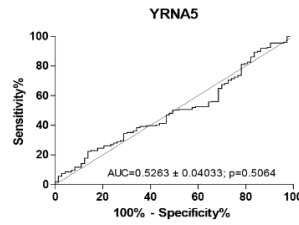**B**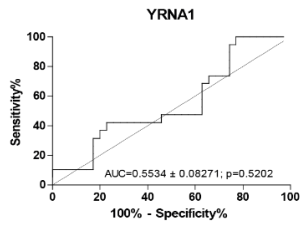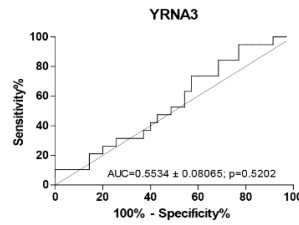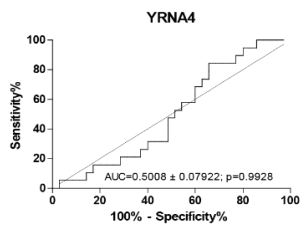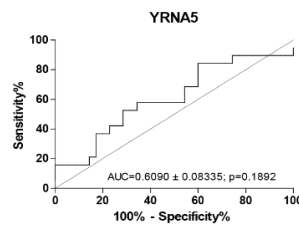**C**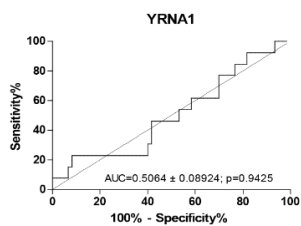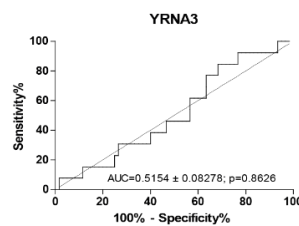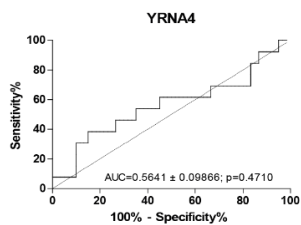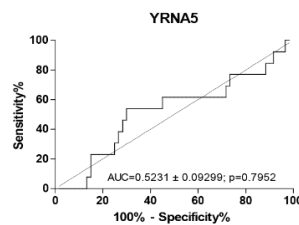

**Supplementary Figure S1.** ROC Analysis of different parameters among YRNAs: A) HPV(+) vs HPV(-); B) DNA+RNA+ vs DNA+RNA-; C) p16 vs other HPV.

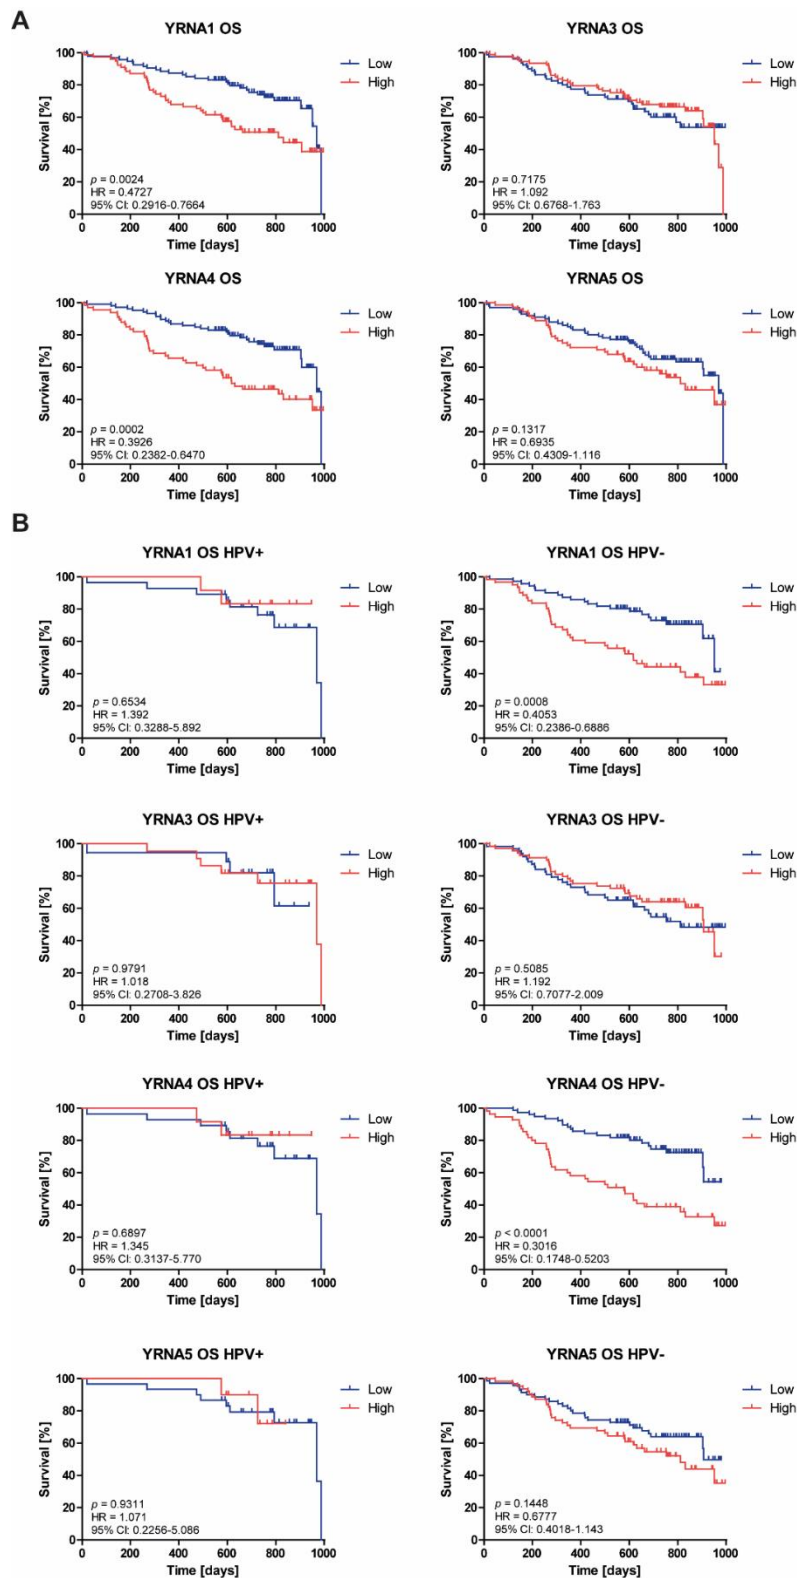

**Supplementary Figure S2.** Association between expression level of YRNA1, YRNA3, YRNA4, and YRNA5, and HNSCC patients' overall survival in 1000 days time in: (A) whole group of patients (HPV(-) and HPV(+)), (B) in only HPV(+) and in only HPV(-). Low and high expression groups of patients were divided based on mean as a cut-off calculated separately for every of the groups, **all patients** (YRNA1: low n = 152, high n = 117; YRNA3: low n = 128, high n = 142; YRNA4: low n = 174, high n = 96; YRNA5 low n = 164, high n =

106), **HPV(+)** (YRNA1: low n = 48, high n = 25; YRNA3: low n = 36, high n = 37; YRNA4: low n = 50, high n = 23; YRNA5 low n = 50, high n = 23), **HPV(-)** (YRNA1: low n = 112, high n = 84; YRNA3: low n = 94, high n = 102; YRNA4: low n = 123, high n = 73; YRNA5 low n = 111, high n = 85).

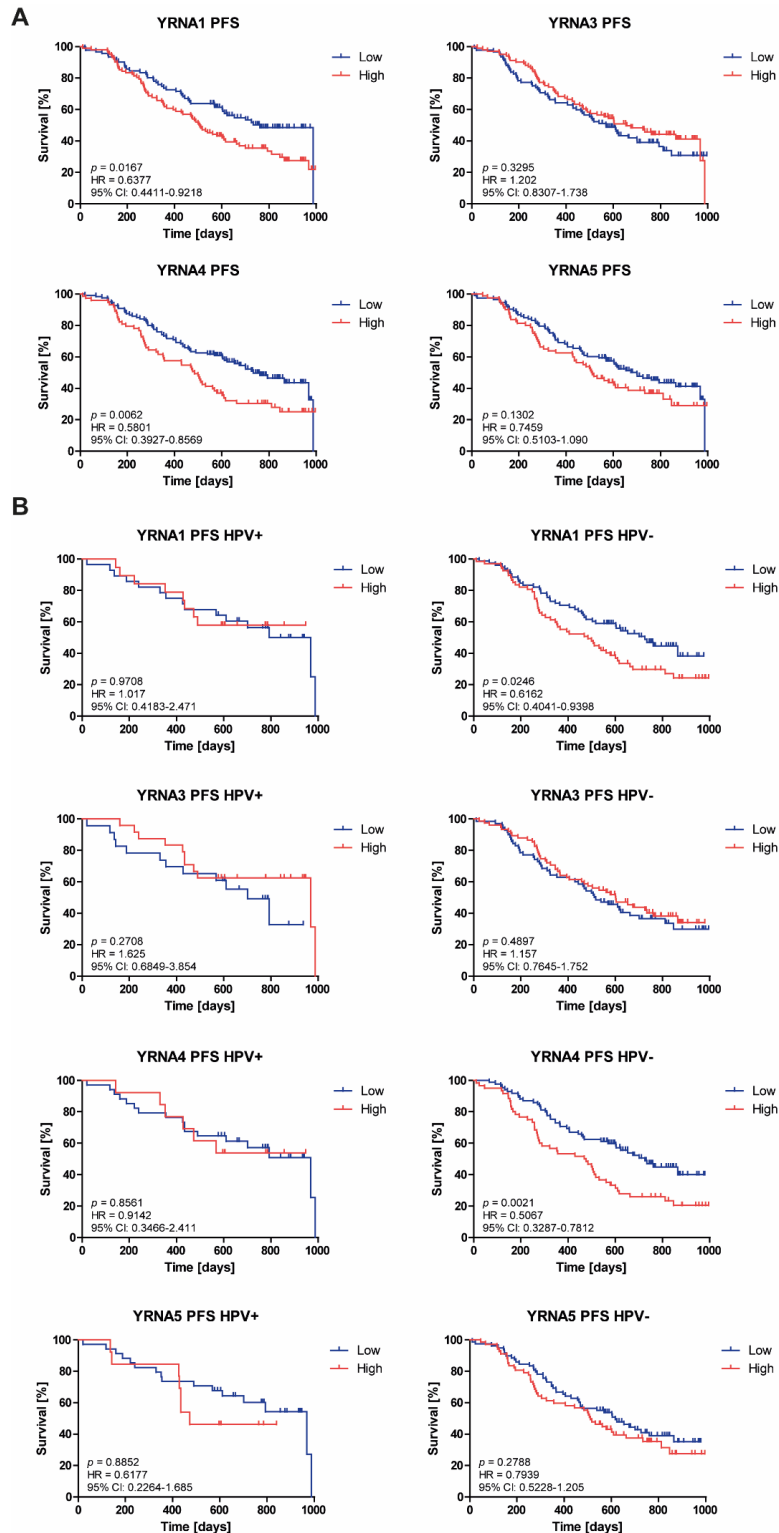

**Supplementary Figure S3.** Association between expression level of YRNA1, YRNA3, YRNA4, and YRNA5, and HNSCC patients' progression-free survival in 1000 days time in:

(A) whole group of patients (HPV(-) and HPV(+)), (B) in only HPV(+) and in only HPV(-). Low and high expression groups of patients were divided based on mean as a cut-off calculated separately for every of the groups: **all patients** (YRNA1: low n = 132, high n = 138; YRNA3: low n = 128, high n = 142; YRNA4: low n = 174, high n = 96; YRNA5 low n = 164, high n = 106), **HPV(+)** (YRNA1: low n = 39, high n = 34; YRNA3: low n = 36, high n = 37; YRNA4: low n = 50, high n = 23; YRNA5 low n = 50, high n = 23), **HPV(-)** (YRNA1: low n = 112, high n = 84; YRNA3: low n = 94, high n = 102; YRNA4: low n = 123, high n = 73; YRNA5 low n = 110, high n = 86).

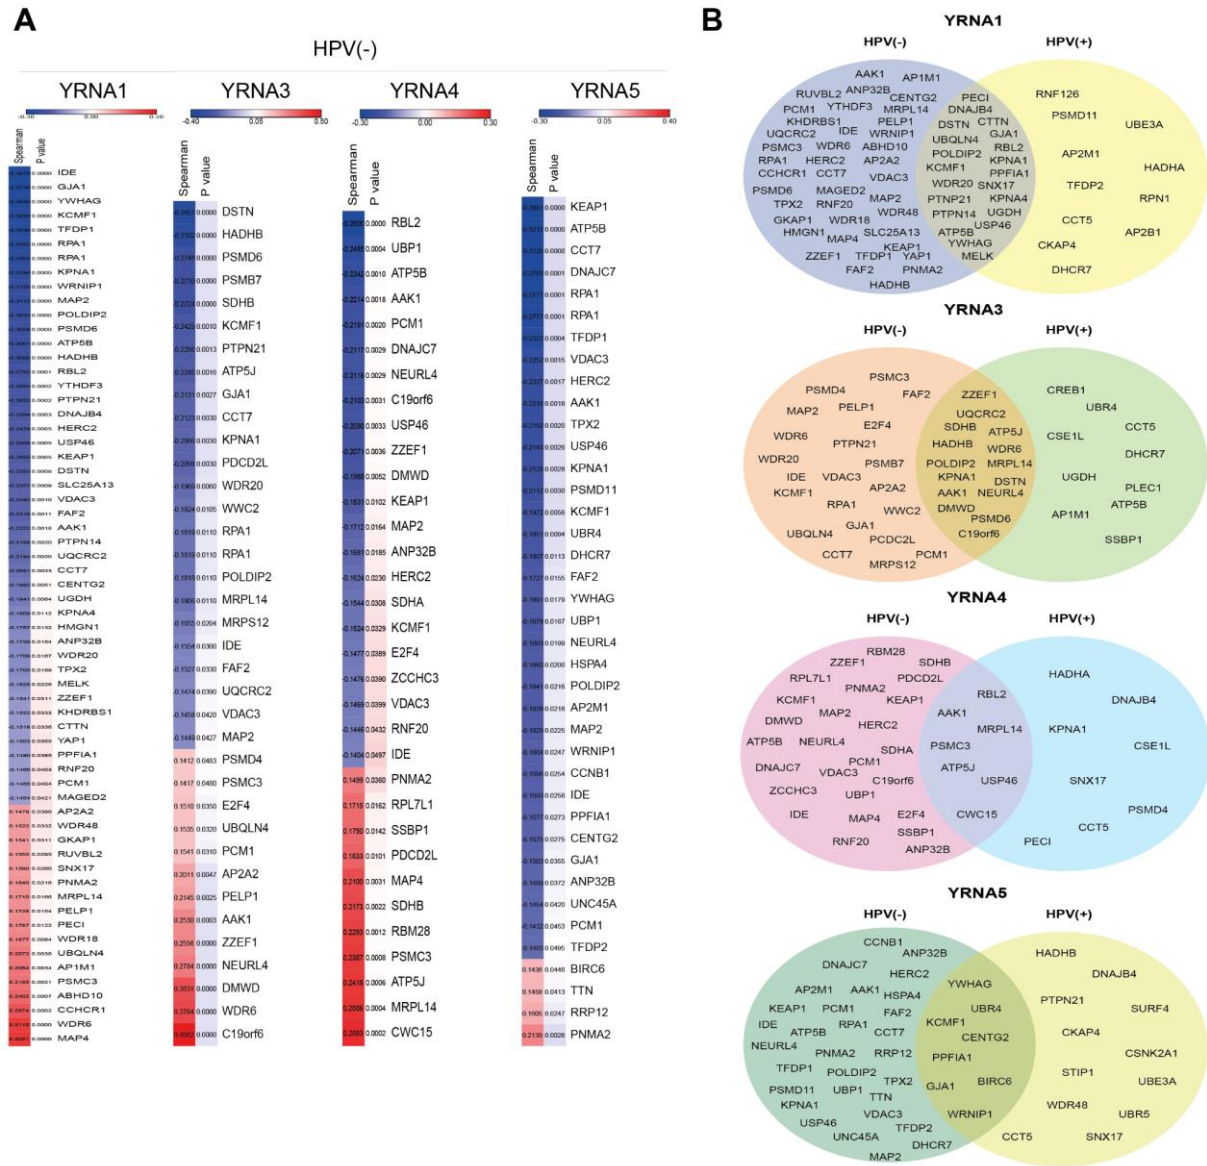

**Supplementary Figure S4.** Analysis of genes correlated with YRNAs based on GEO database. A) Heat maps of genes correlated with YRNAs in HPV(-) group; B) Venn Diagrams depicting gene distribution expression between HPV(+) and HPV(-) groups among YRNAs.
